# Supplementary material for: Lidar observations of pyrocumulonimbus smoke plumes in the UTLS over Tomsk (Western Siberia, Russia) from 2000 to 2017
Source: Copernicus journal article supplement (doi:10.5194/acp-19-3341-2019), 2019-03-14

The HYSPLIT backward trajectories started from altitudes of about 11.75 km over Tomsk (56.48° N, 85.05° E) at 17:30 UTC on 27 May 2016.

## The closest to Tomsk daytime (image three) and nighttime (image one) CALIPSO orbit tracks, version 4.10

### Daytime orbit track before lidar measurement in Tomsk:

[https://www-calipso.larc.nasa.gov/products/lidar/browse\\_images/show\\_detail.php?s=production&v=V4-10&browse\\_date=2015-07-16&orbit\\_time=19-43-13&page=4&granule\\_name=CAL\\_LID\\_L1-Standard-V4-10.2015-07-16T19-43-13ZD.hdf](https://www-calipso.larc.nasa.gov/products/lidar/browse_images/show_detail.php?s=production&v=V4-10&browse_date=2015-07-16&orbit_time=19-43-13&page=4&granule_name=CAL_LID_L1-Standard-V4-10.2015-07-16T19-43-13ZD.hdf)

### Nighttime orbit track after lidar measurement in Tomsk:

[https://www-calipso.larc.nasa.gov/products/lidar/browse\\_images/show\\_detail.php?s=production&v=V4-10&browse\\_date=2015-07-16&orbit\\_time=20-35-33&page=1&granule\\_name=CAL\\_LID\\_L1-Standard-V4-10.2015-07-16T20-35-33ZN.hdf](https://www-calipso.larc.nasa.gov/products/lidar/browse_images/show_detail.php?s=production&v=V4-10&browse_date=2015-07-16&orbit_time=20-35-33&page=1&granule_name=CAL_LID_L1-Standard-V4-10.2015-07-16T20-35-33ZN.hdf)

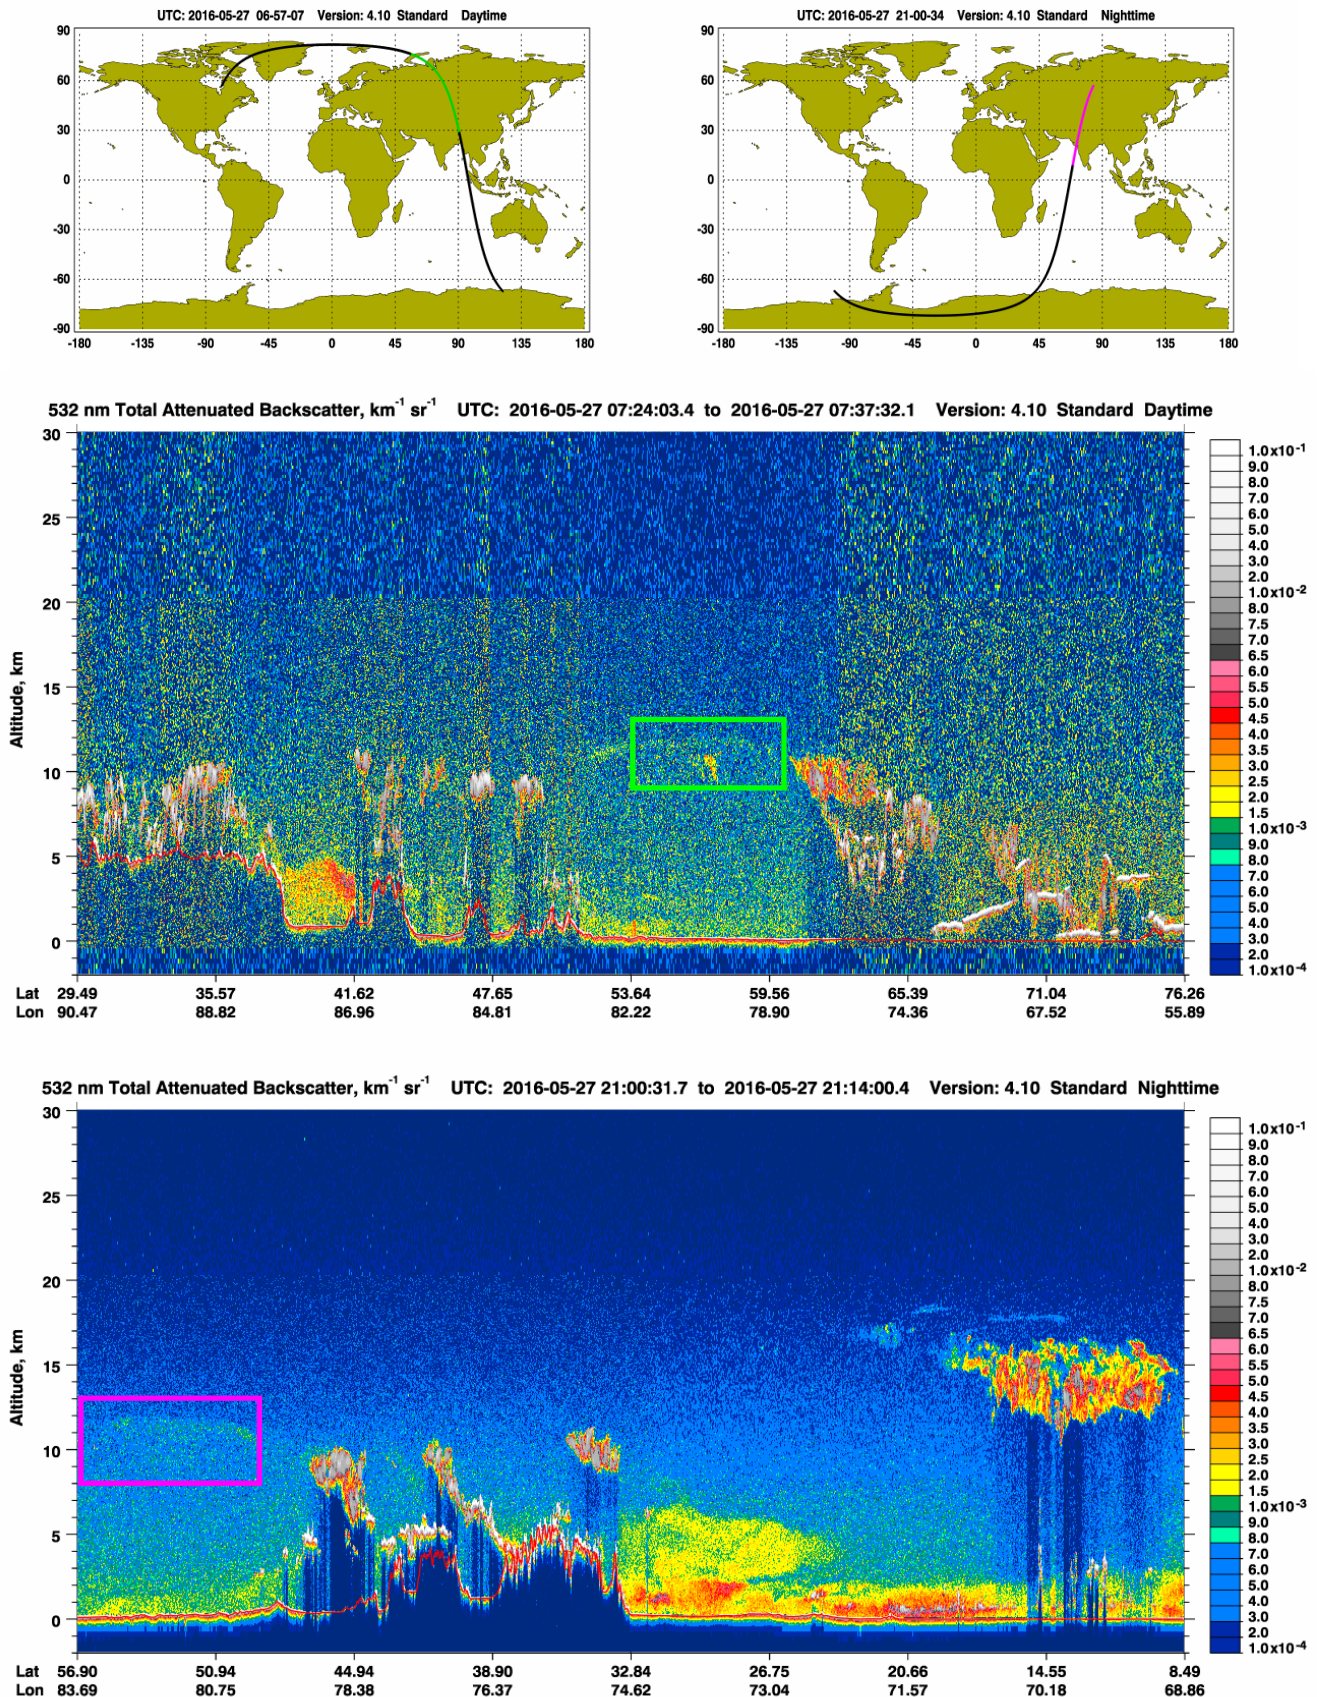



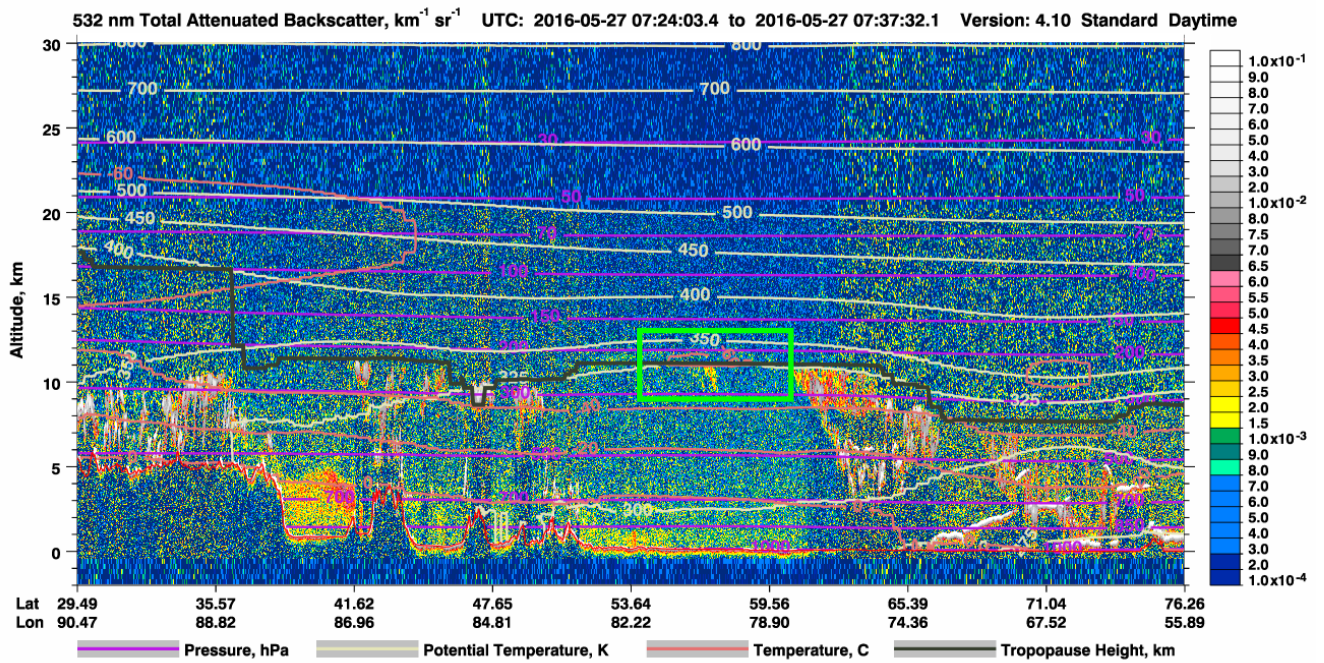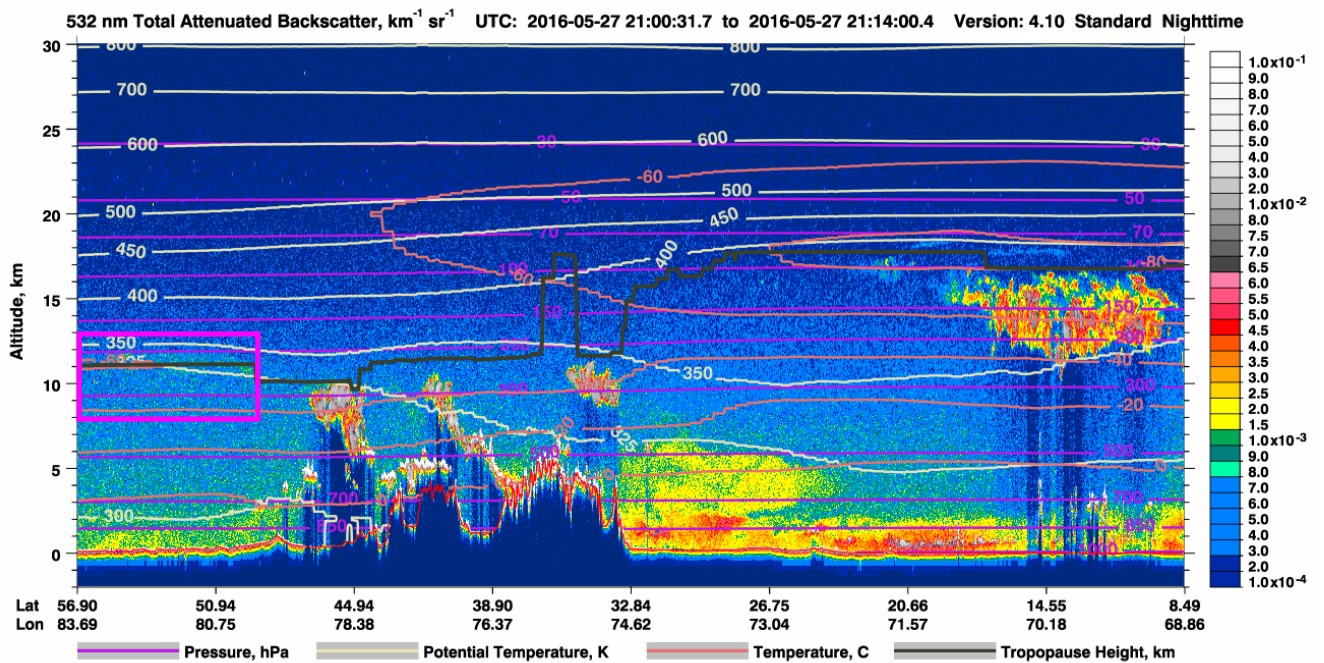

Vertical Feature Mask UTC: 2016-05-27 07:24:03.4 to 2016-05-27 07:37:32.1 Version: 4.10 Standard Daytime

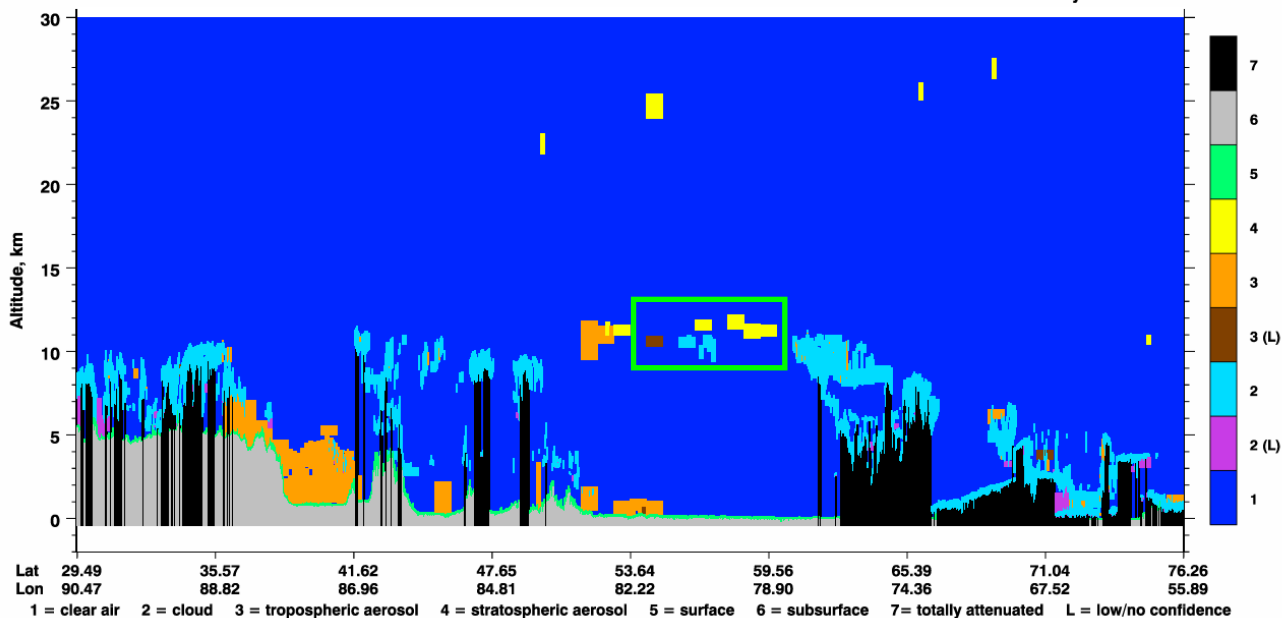

Vertical Feature Mask UTC: 2016-05-27 21:00:31.7 to 2016-05-27 21:14:00.4 Version: 4.10 Standard Nighttime

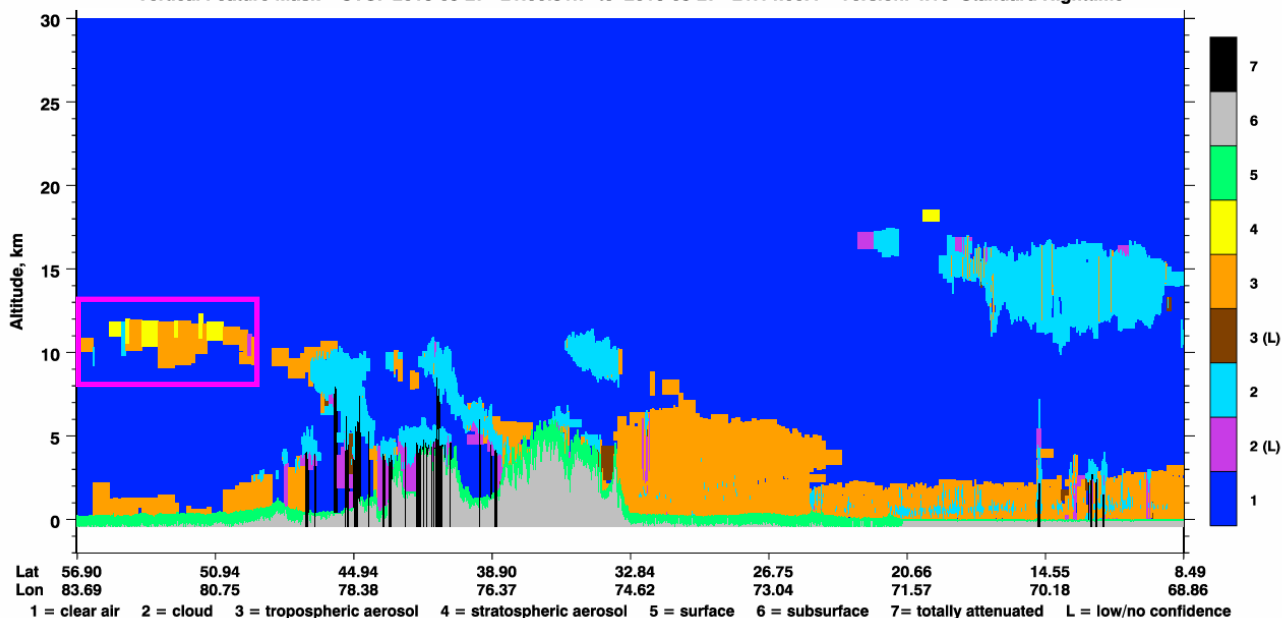

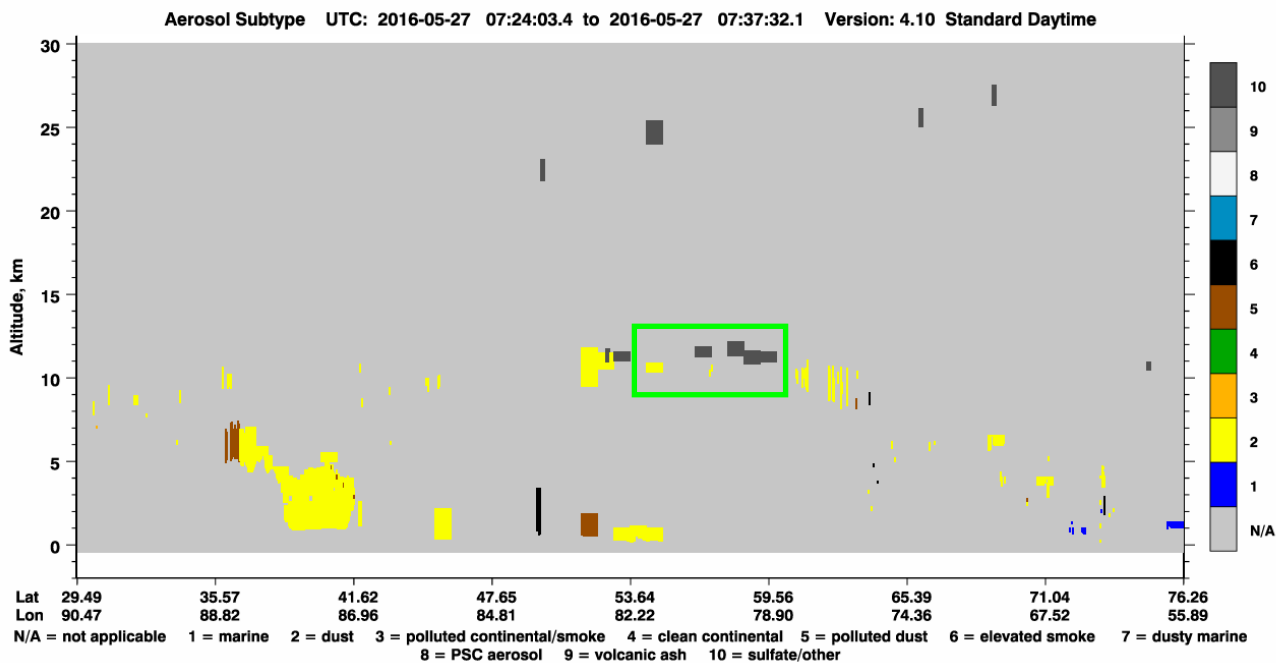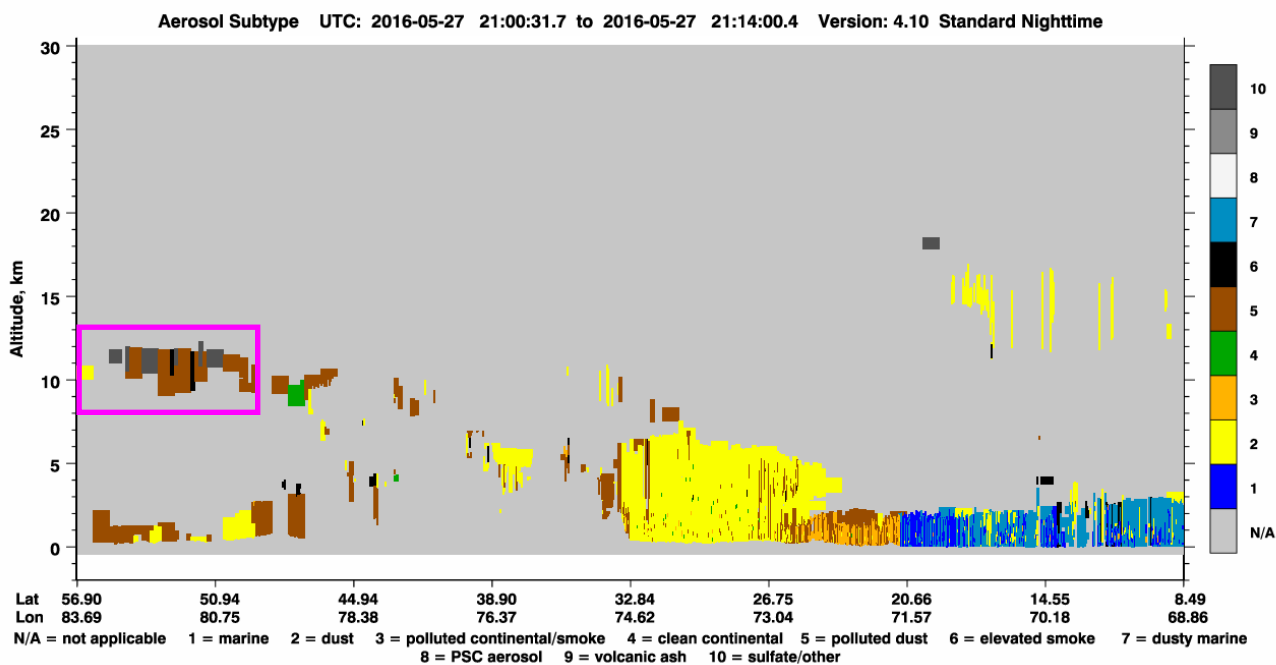

Cloud Subtype UTC: 2016-05-27 07:24:03.4 to 2016-05-27 07:37:32.1 Version: 4.10 Standard Daytime

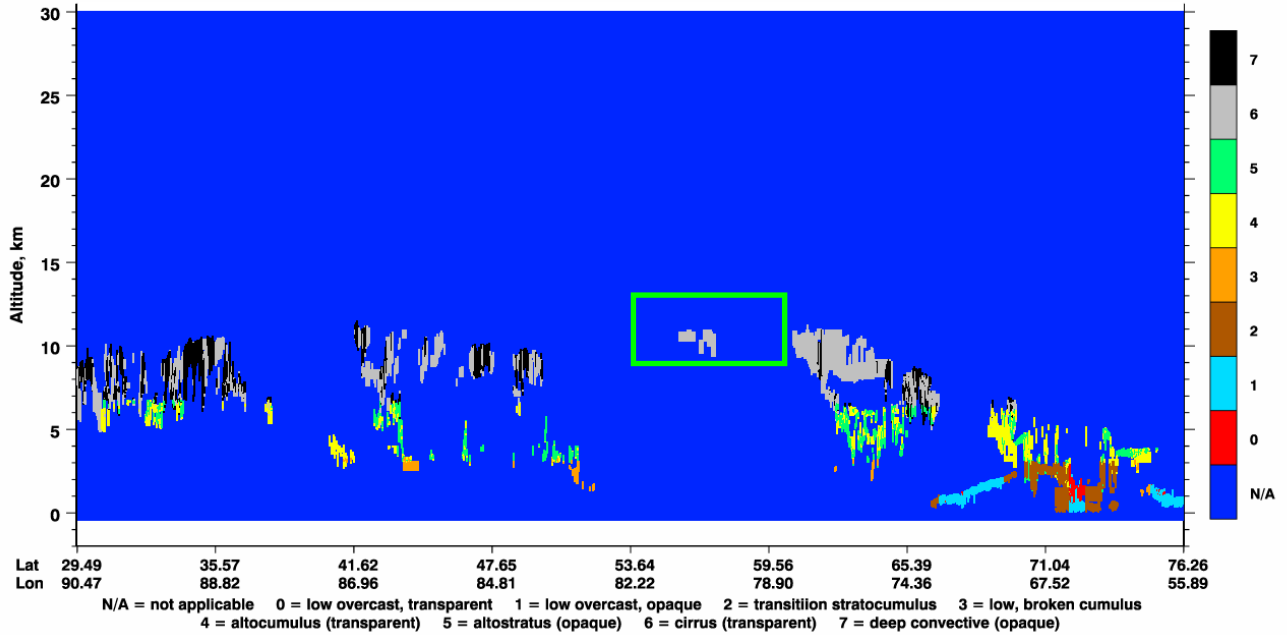

Cloud Subtype UTC: 2016-05-27 21:00:31.7 to 2016-05-27 21:14:00.4 Version: 4.10 Standard Nighttime

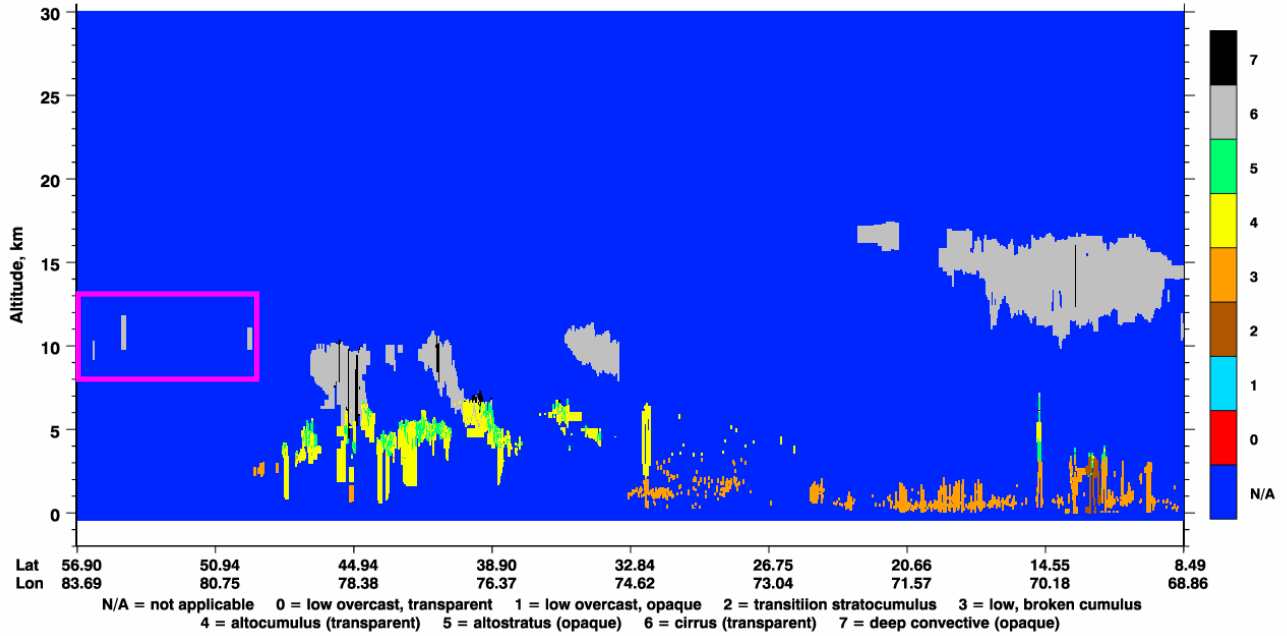

Supplement: Supplementary file 3 [file acp-19-3341-2019-supplement.zip]
