# Supplementary material for: Lidar observations of pyrocumulonimbus smoke plumes in the UTLS over Tomsk (Western Siberia, Russia) from 2000 to 2017
Source: Copernicus journal article supplement (doi:10.5194/acp-19-3341-2019), 2019-03-14

The HYSPLIT backward trajectories started from altitudes of about 15.75 km over Tomsk (56.48° N, 85.05° E) at 17:00 UTC on 26 August 2017.

## The closest to Tomsk daytime (image three) and nighttime (image one) CALIPSO orbit tracks, version 4.10

### Daytime orbit track before lidar measurement in Tomsk:

[https://www-calipso.larc.nasa.gov/products/lidar/browse\\_images/show\\_detail.php?s=production&v=V4-10&browse\\_date=2017-08-26&orbit\\_time=07-42-46&page=3&granule\\_name=CAL\\_LID\\_L1-Standard-V4-10.2017-08-26T07-42-46ZD.hdf](https://www-calipso.larc.nasa.gov/products/lidar/browse_images/show_detail.php?s=production&v=V4-10&browse_date=2017-08-26&orbit_time=07-42-46&page=3&granule_name=CAL_LID_L1-Standard-V4-10.2017-08-26T07-42-46ZD.hdf)

### Nighttime orbit track after lidar measurement in Tomsk:

[https://www-calipso.larc.nasa.gov/products/lidar/browse\\_images/show\\_detail.php?s=production&v=V4-10&browse\\_date=2017-08-26&orbit\\_time=20-07-18&page=1&granule\\_name=CAL\\_LID\\_L1-Standard-V4-10.2017-08-26T20-07-18ZN.hdf](https://www-calipso.larc.nasa.gov/products/lidar/browse_images/show_detail.php?s=production&v=V4-10&browse_date=2017-08-26&orbit_time=20-07-18&page=1&granule_name=CAL_LID_L1-Standard-V4-10.2017-08-26T20-07-18ZN.hdf)

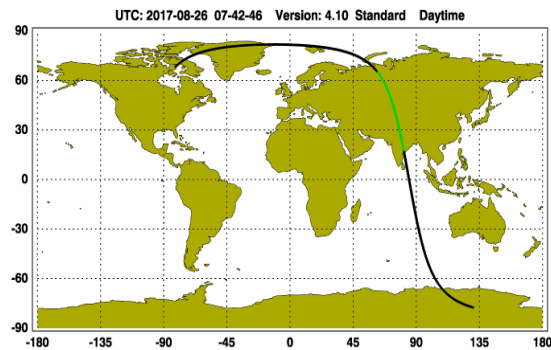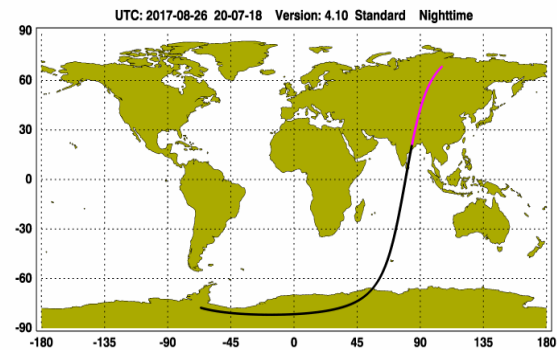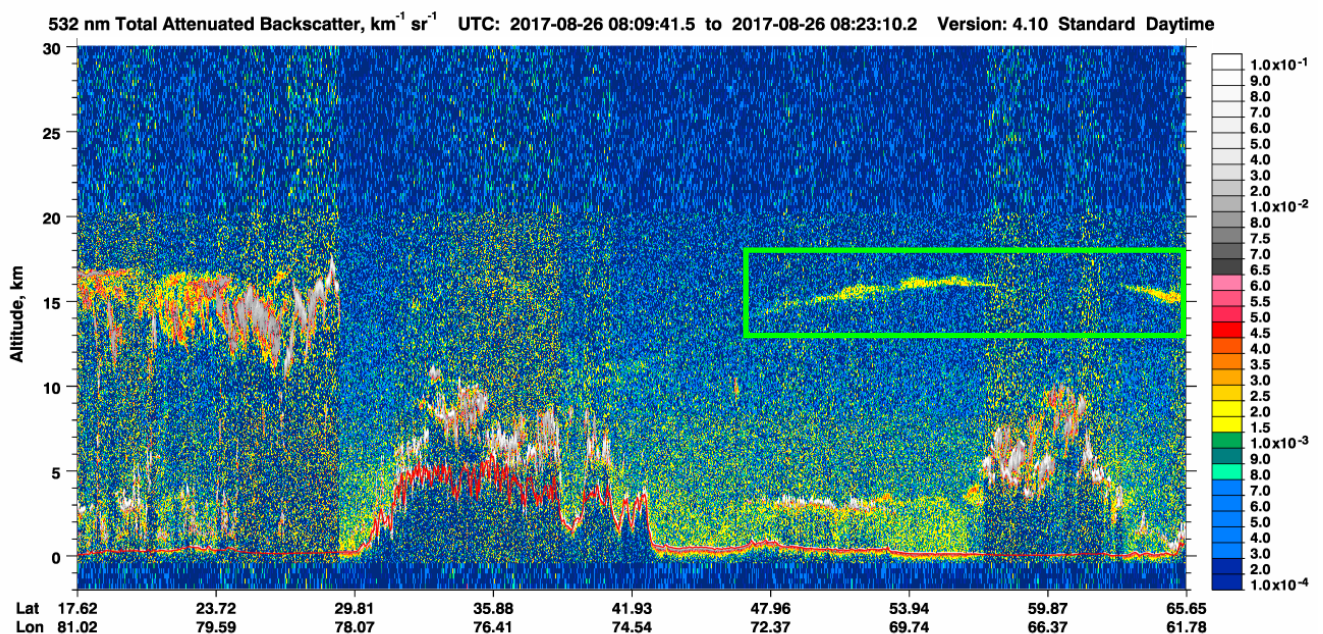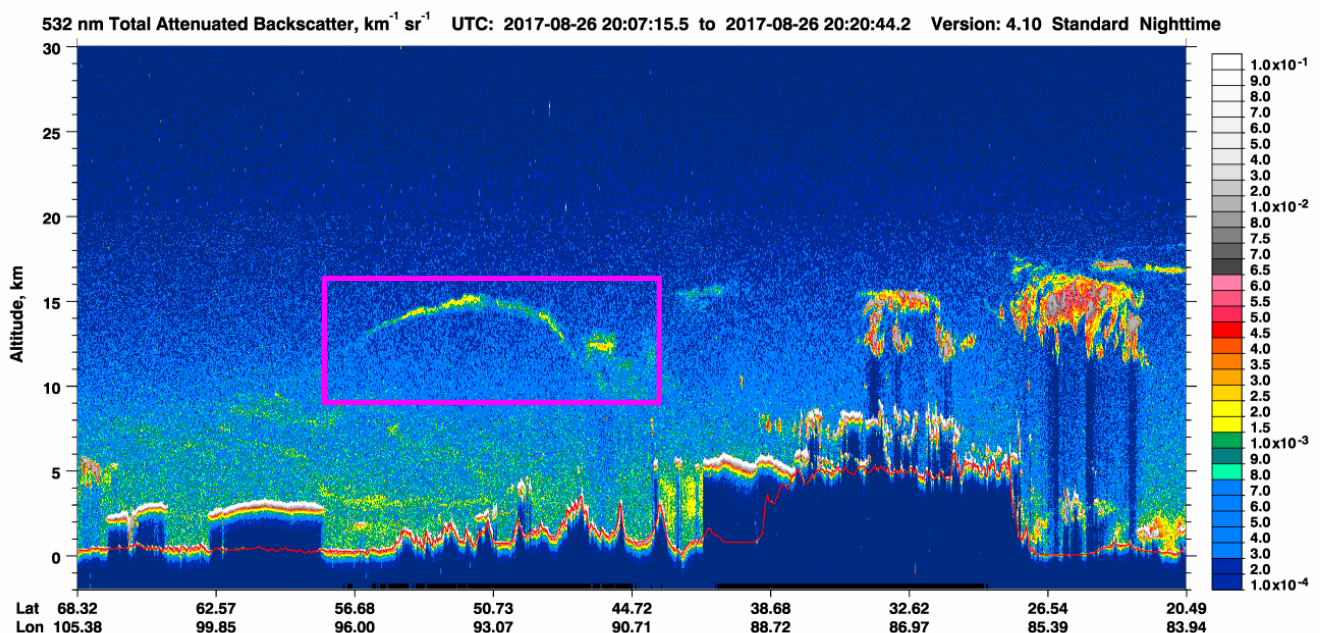



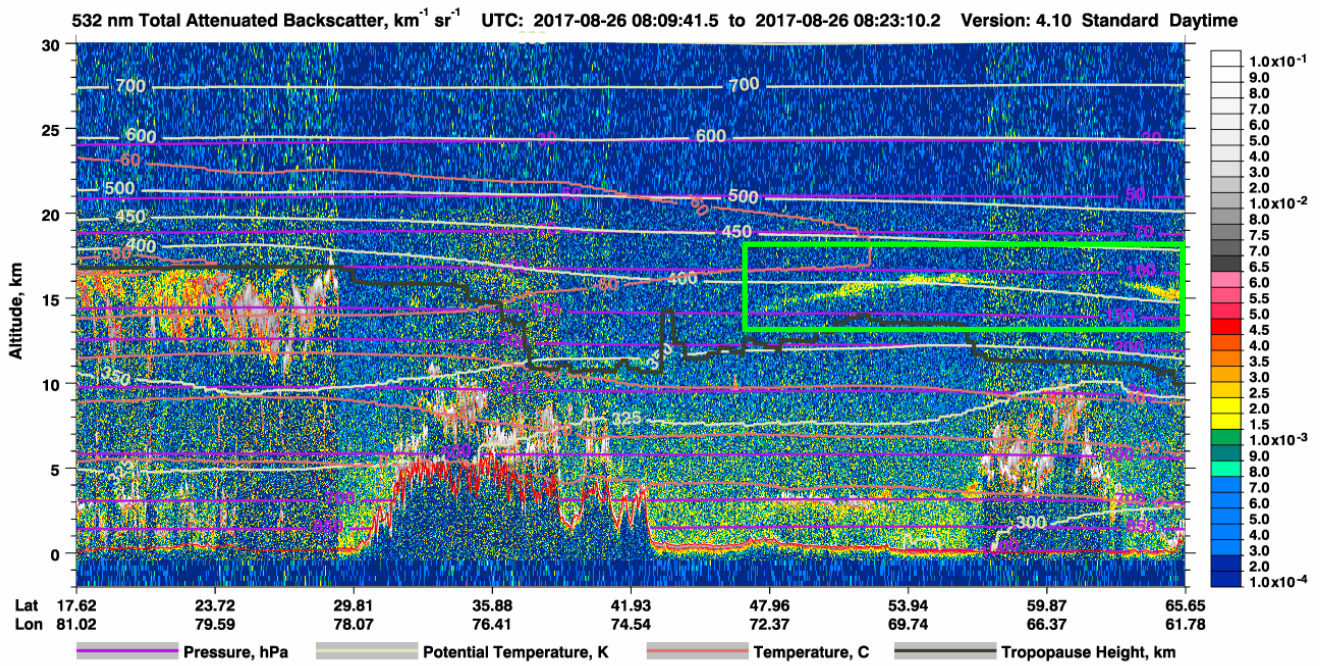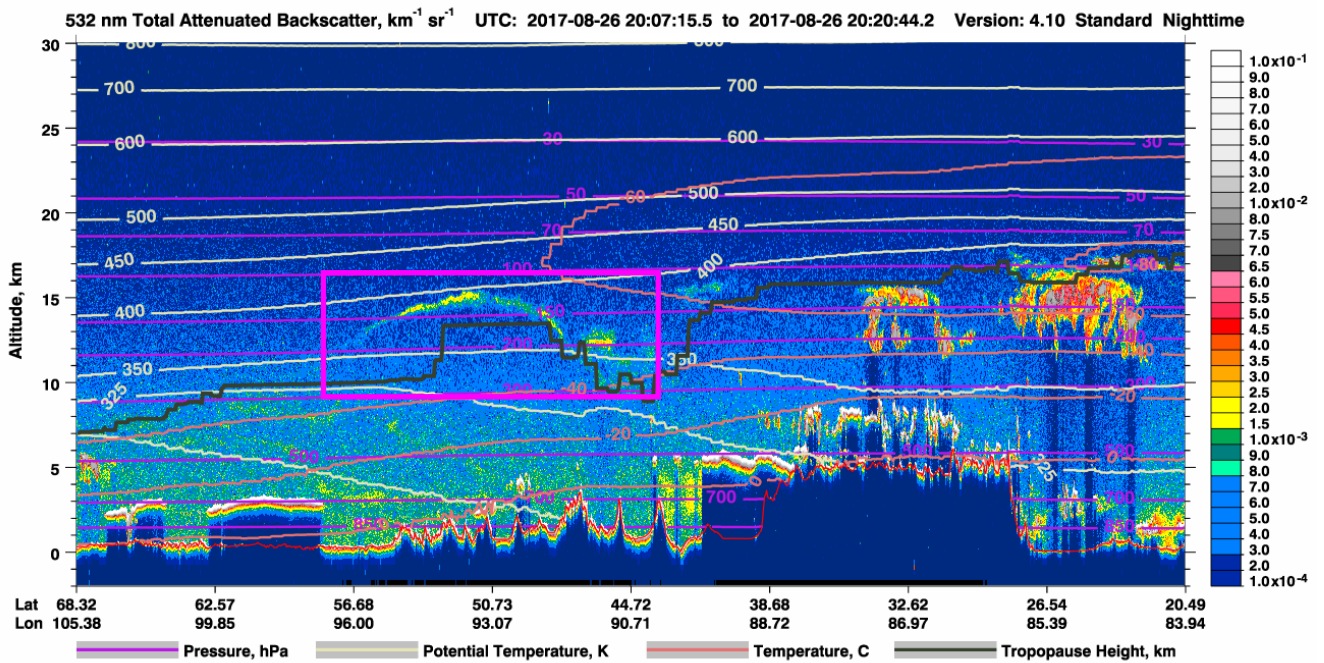

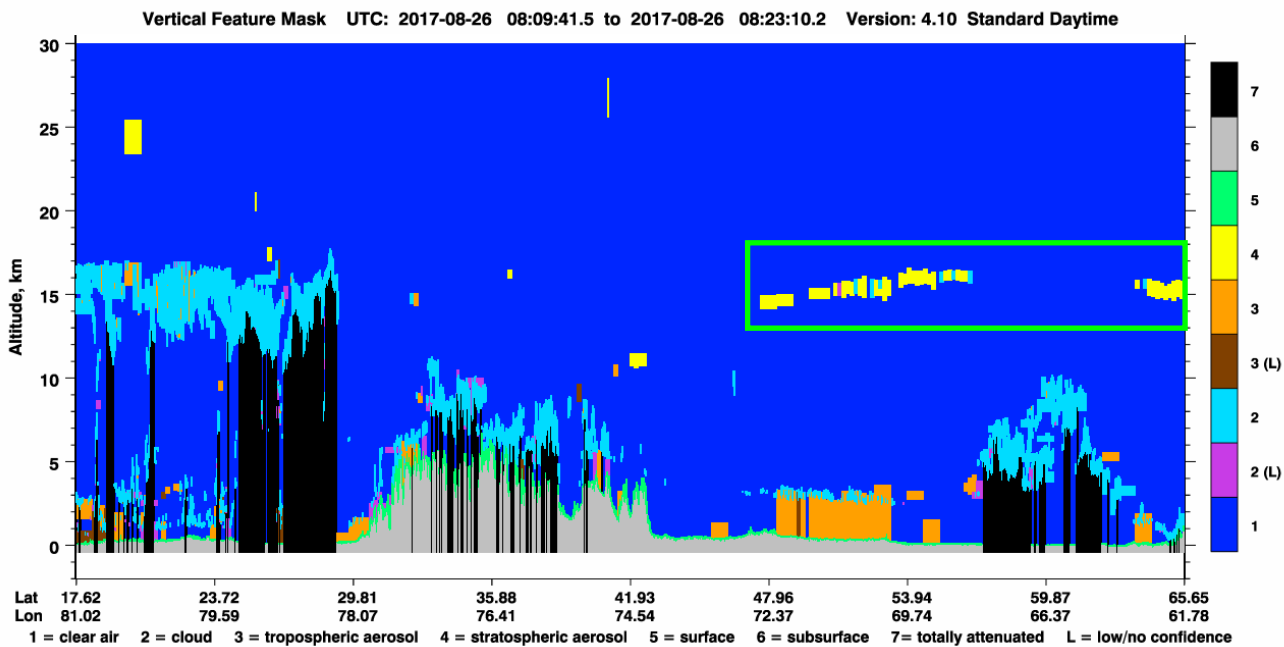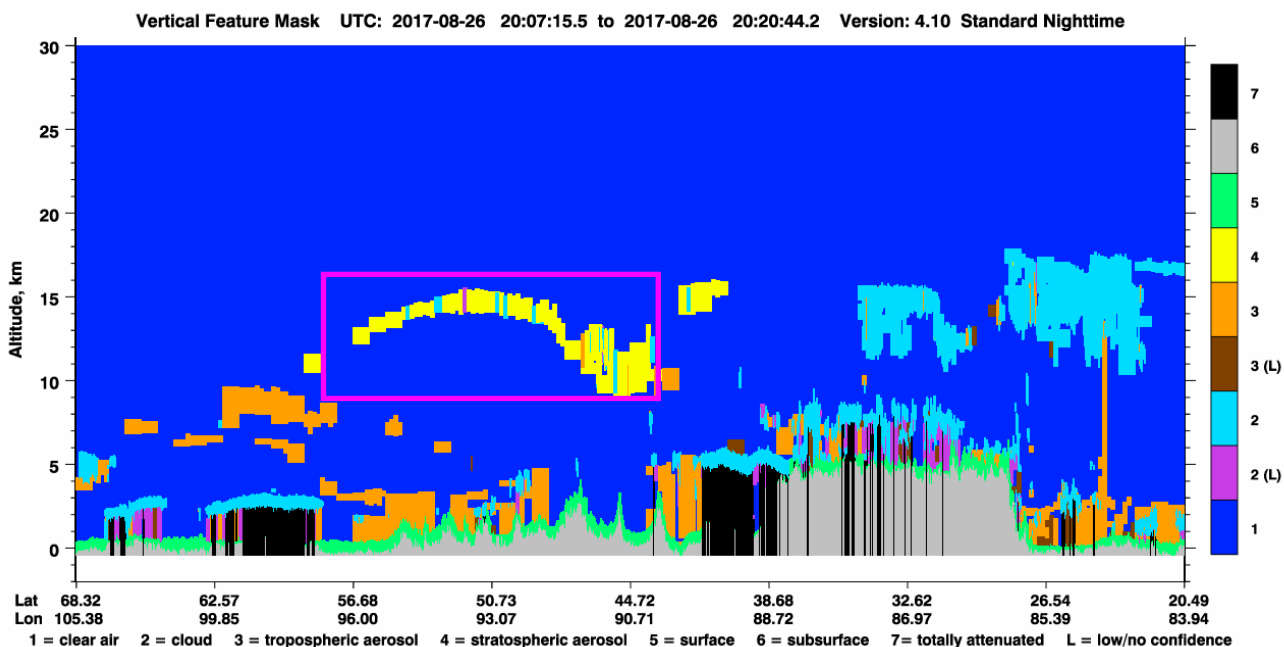

Aerosol Subtype UTC: 2017-08-26 08:09:41.5 to 2017-08-26 08:23:10.2 Version: 4.10 Standard Daytime

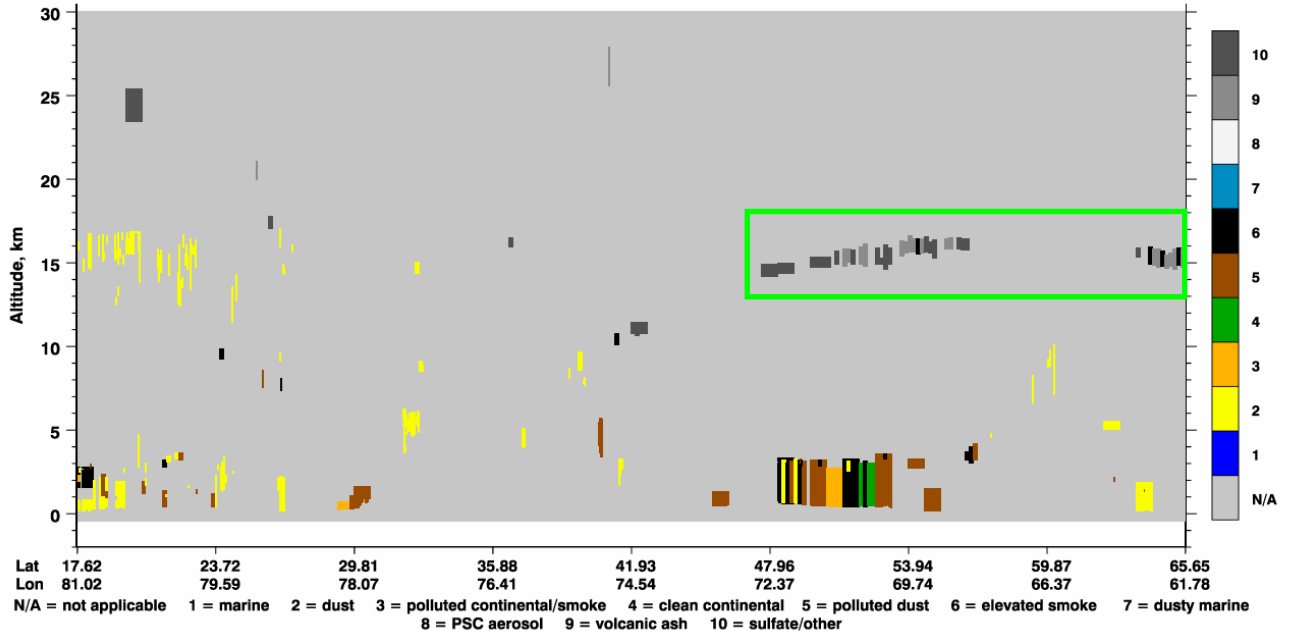

Aerosol Subtype UTC: 2017-08-26 20:07:15.5 to 2017-08-26 20:20:44.2 Version: 4.10 Standard Nighttime

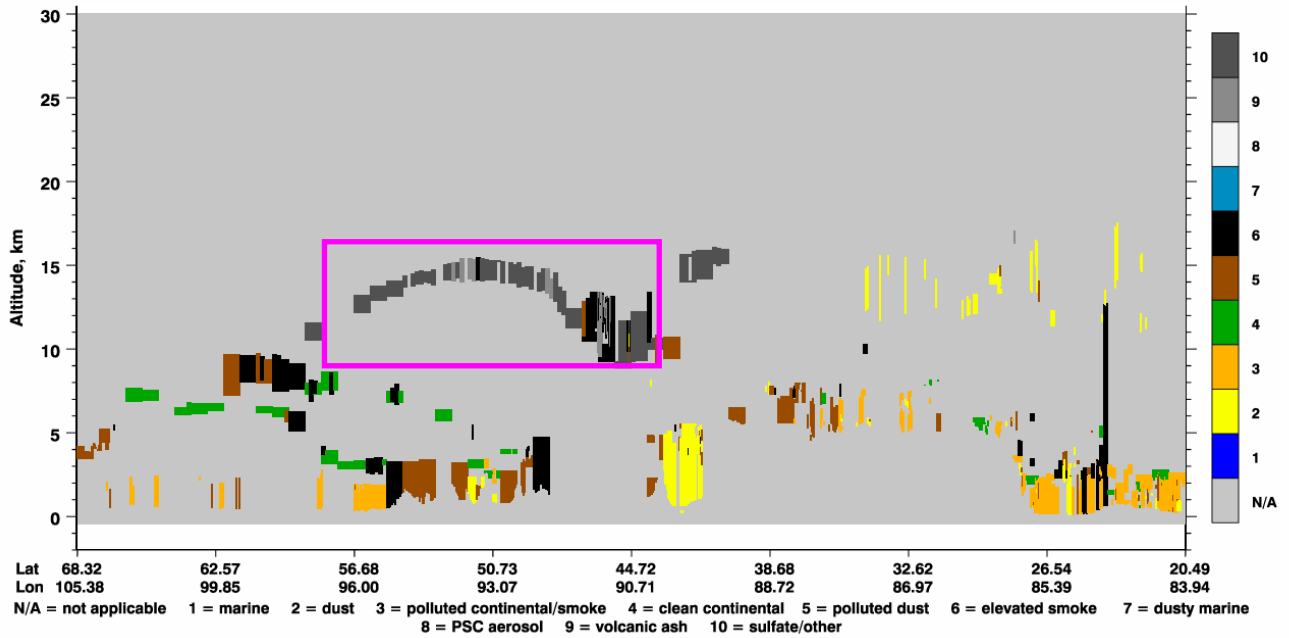

Cloud Subtype UTC: 2017-08-26 08:09:41.5 to 2017-08-26 08:23:10.2 Version: 4.10 Standard Daytime

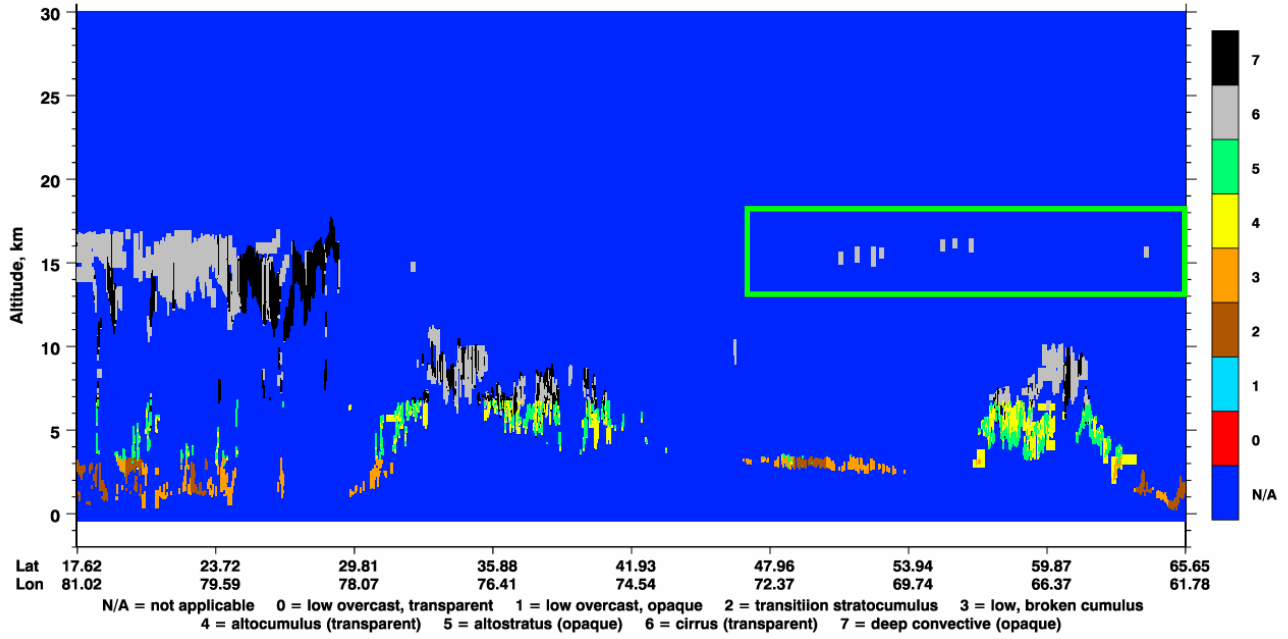

Cloud Subtype UTC: 2017-08-26 20:07:15.5 to 2017-08-26 20:20:44.2 Version: 4.10 Standard Nighttime

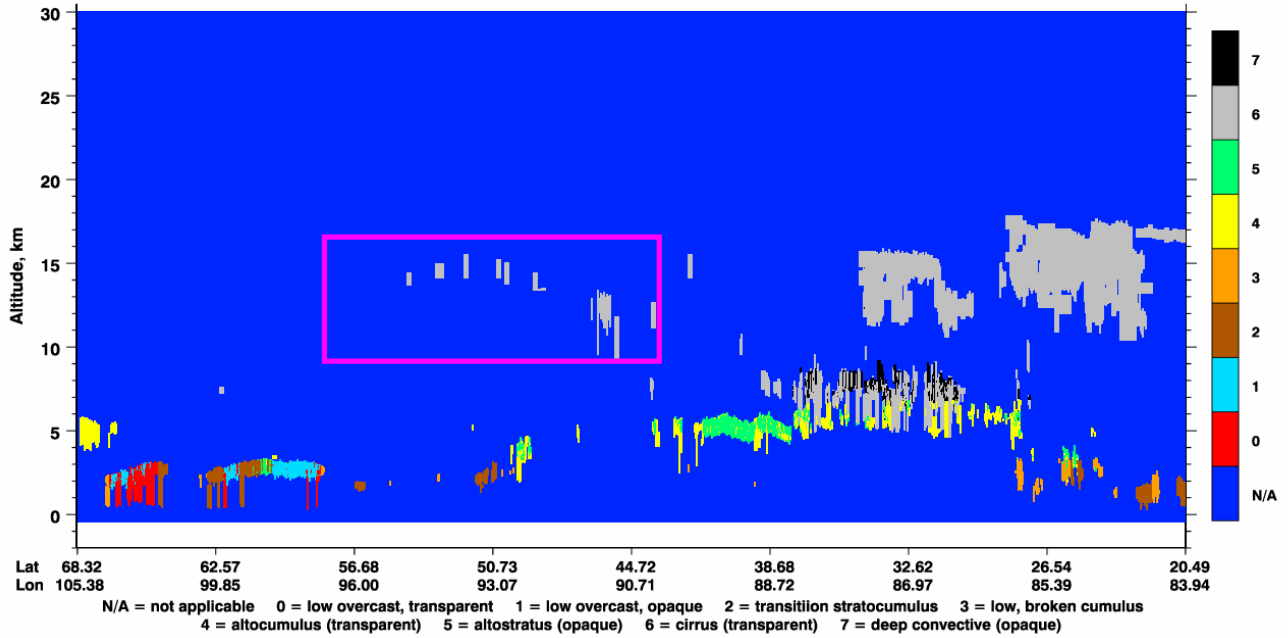

Supplement: Supplementary file 2 [file acp-19-3341-2019-supplement.zip]
