# Supplementary material for: Lidar observations of pyrocumulonimbus smoke plumes in the UTLS over Tomsk (Western Siberia, Russia) from 2000 to 2017
Source: Copernicus journal article supplement (doi:10.5194/acp-19-3341-2019), 2019-03-14
Supplement: Supplementary file 1 [file acp-19-3341-2019-supplement.zip]

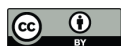

## *Supplement of*

# **Lidar observations of pyrocumulonimbus smoke plumes in the UTLs over Tomsk (Western Siberia, Russia) from 2000 to 2017**

Vladimir V. Zuev et al.

*Correspondence to:* Vladislav V. Gerasimov (gvvsake@mail.ru)

- [acp-19-3341-2019-supplement-title-page.pdf](#)
- (Fig. 2a) 4–5 Sep 2000. Sonde data. Emeljanovo (29572 Russia).xlsx
- (Fig. 2a) 4–5 Sep 2000. Sonde data. Novosibirsk (29634, Russia).xlsx
- (Fig. 2b) 27 Aug 2000. Sonde data. Green Bay (71645, WI, USA), Davenport (74455, IA, USA).xlsx
- (Fig. 3a) 15–16 Jul 2002. Sonde data. Emeljanovo (29572 Russia).xlsx
- (Fig. 3a) 15–16 Jul 2002. Sonde data. Novosibirsk (29634, Russia).xlsx
- (Fig. 3b) 1 Jul 2002. Sonde data. Boise (72681, ID, USA), Riverton (72672, WY, USA).xlsx
- (Fig. 4a) 29–30 Aug 2003. Sonde data. Emeljanovo (29572 Russia).xlsx
- (Fig. 4a) 29–30 Aug 2003. Sonde data. Kolpashevo (29231, Russia).xlsx
- (Fig. 4a) 29–30 Aug 2003. Sonde data. Novosibirsk (29634, Russia).xlsx
- (Fig. 4b) 18 Aug 2003. Sonde data. Churchill (71913, MB, Canada), Inukjuak (71907, QB, Canada).xlsx
- (Fig. 5a) 14 Jul 2013. CALIPSO data.pdf
- (Fig. 5a) 14–10 Jul 2013. Sonde data. Kolpashevo (29231, Russia).xlsx
- (Fig. 5a) 14–15 Jul 2013. Sonde data. Novosibirsk (29634, Russia).xlsx
- (Fig. 5b) 4–5 Jul 2013. Sonde data. Moosonee (71836, ON, Canada), La Grande Iv (71823, QB, Canada).xlsx
- (Fig. 6a) 16 Jul 2015. CALIPSO data.pdf
- (Fig. 6a) 16–17 Jul 2015. Sonde data. Emeljanovo (29572 Russia).xlsx
- (Fig. 6a) 16–17 Jul 2015. Sonde data. Kolpashevo (29231 Russia).xlsx
- (Fig. 6a) 16–17 Jul 2015. Sonde data. Novosibirsk (29634 Russia).xlsx
- (Fig. 6b) 11 Jul 2015. Sonde data. Prince George (71908, BC, Canada), Fort Smith (71934, NT, Canada).xlsx

- (Fig. 7a) 27 May 2016. CALIPSO data.pdf
- (Fig. 7a) 27-28 May 2016. Sonde data. Emeljanovo (29572 Russia).xlsx
- (Fig. 7a) 27-28 May 2016. Sonde data. Kolpashevo (29231 Russia).xlsx
- (Fig. 7a) 27-28 May 2016. Sonde data. Novosibirsk (29634, Russia).xlsx
- (Fig. 7b) 16-17 May 2016. Sonde data. Fort Nelson (71945, BC, Canada), Fort Smith (71934, NT, Canada).xlsx
- (Fig. 8a) 26 Aug 2017. CALIPSO data.pdf
- (Fig. 9a,b,c) 12 Aug 2017. Sonde data. Port Hardy (71109, BC, Canada), Prince George (71908, BC, Canada).xlsx
- Data for Figure 10.opj
- Lidar data for Figure 2a.opj
- Lidar data for Figure 3a.opj
- Lidar data for Figure 4a.opj
- Lidar data for Figure 5a.opj
- Lidar data for Figure 6a.opj
- Lidar data for Figure 7a.opj
- Lidar data for Figure 8a.opj
- Lidar data for Figure 8b.opj
- Lidar data for Figure 8c.opj

The copyright of individual parts of the supplement might differ from the CC BY 4.0 License.
