# Supplementary material for: Lidar observations of pyrocumulonimbus smoke plumes in the UTLS over Tomsk (Western Siberia, Russia) from 2000 to 2017
Source: Copernicus journal article supplement (doi:10.5194/acp-19-3341-2019), 2019-03-14

The HYSPLIT backward trajectories started from altitudes of 10.6–10.7 km over Tomsk (56.48° N, 85.05° E) at 17:30 UTC on 14 July 2013.

## The closest to Tomsk nighttime CALIPSO orbit track (image one), version 4.10 (After lidar measurement in Tomsk)

[https://www-calipso.larc.nasa.gov/products/lidar/browse\\_images/show\\_detail.php?s=production&v=V4-10&browse\\_date=2013-07-14&orbit\\_time=20-10-50&page=1&granule\\_name=CAL\\_LID\\_L1-Standard-V4-10.2013-07-14T20-10-50ZN.hdf](https://www-calipso.larc.nasa.gov/products/lidar/browse_images/show_detail.php?s=production&v=V4-10&browse_date=2013-07-14&orbit_time=20-10-50&page=1&granule_name=CAL_LID_L1-Standard-V4-10.2013-07-14T20-10-50ZN.hdf)

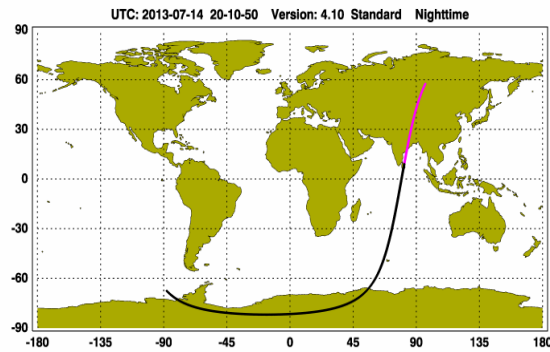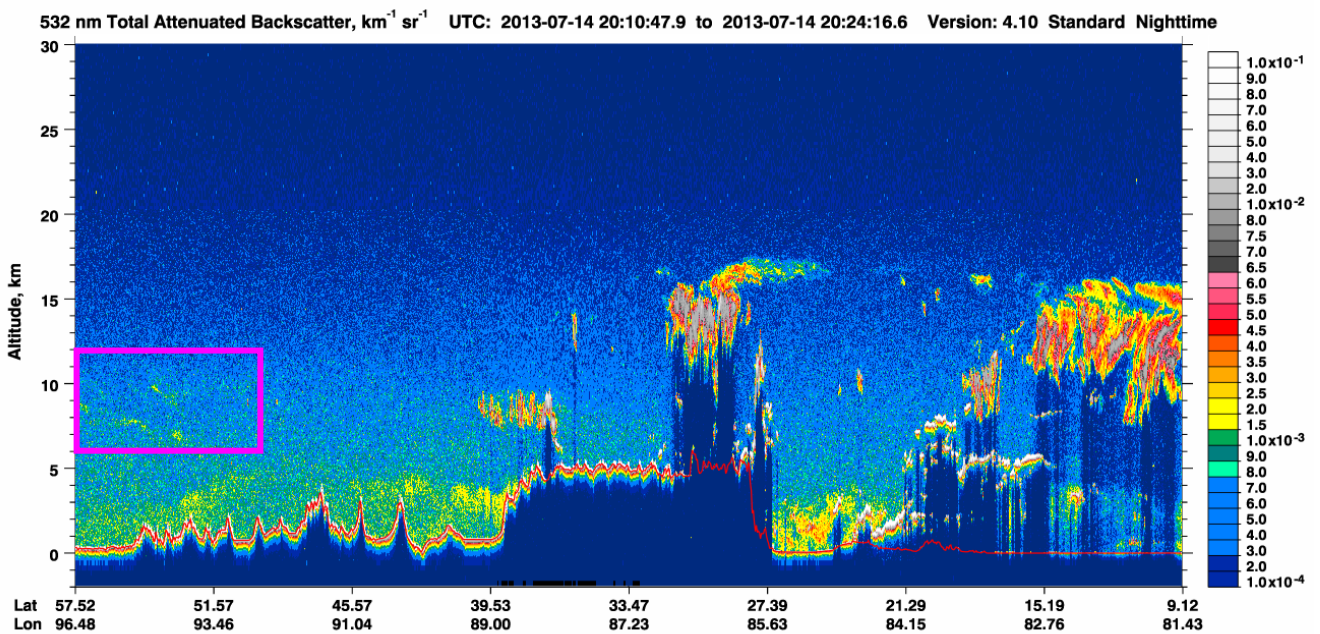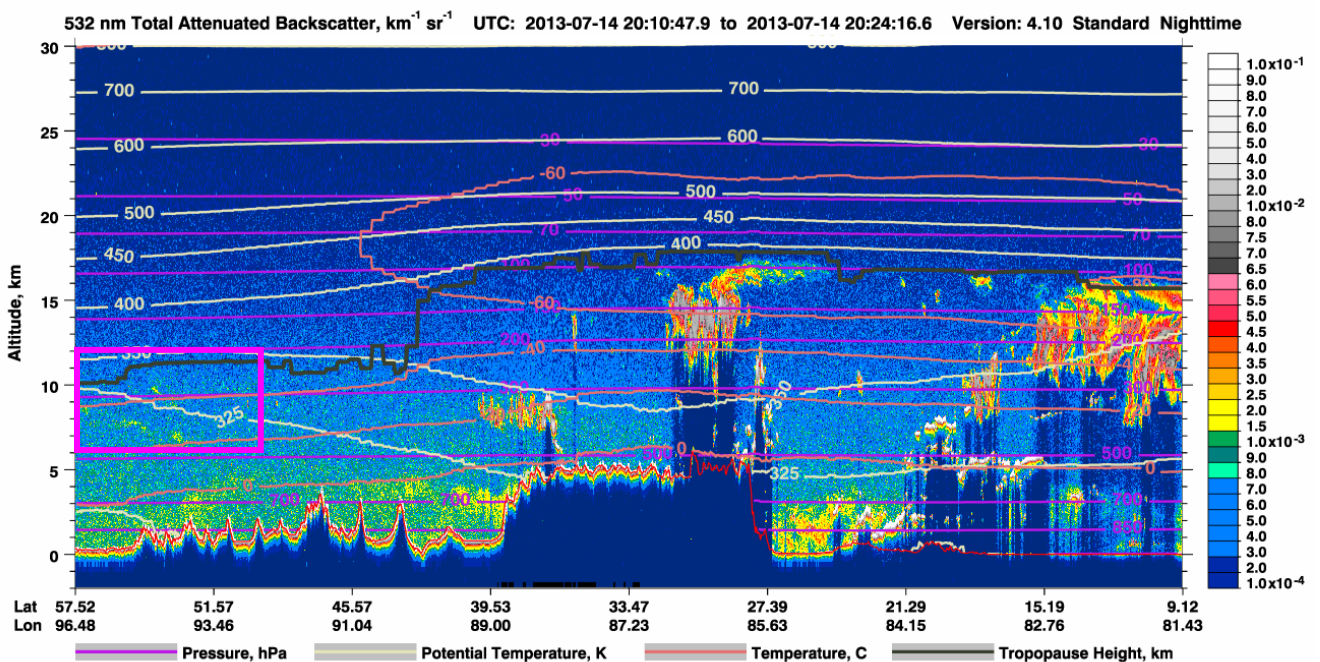

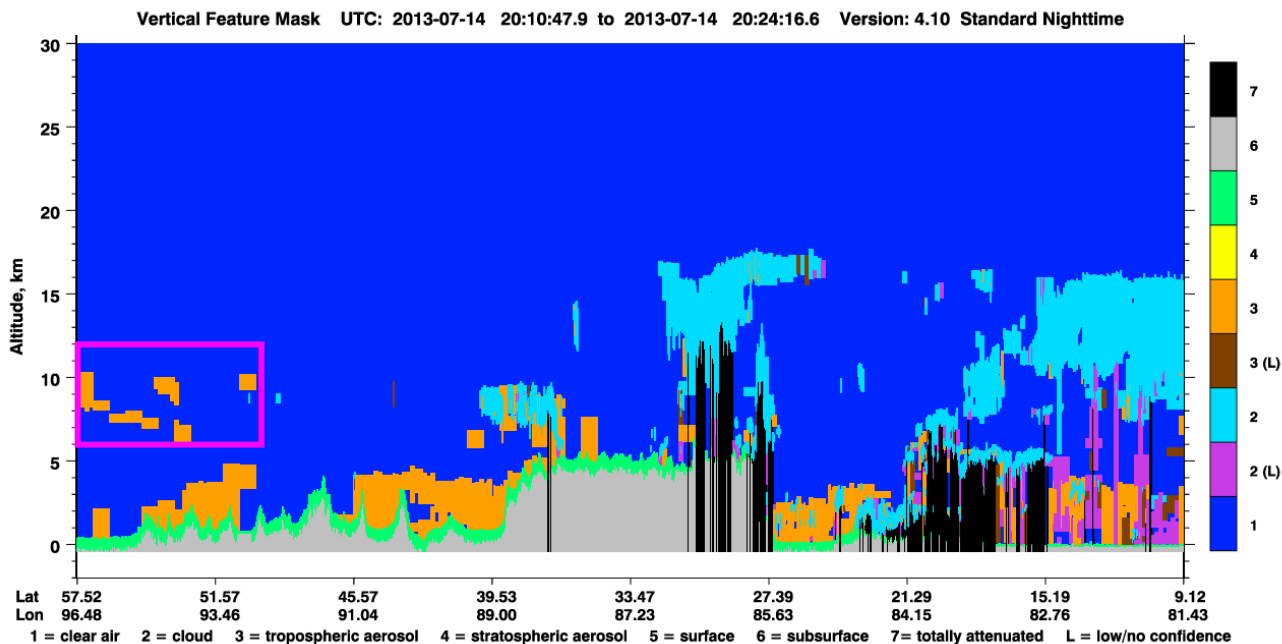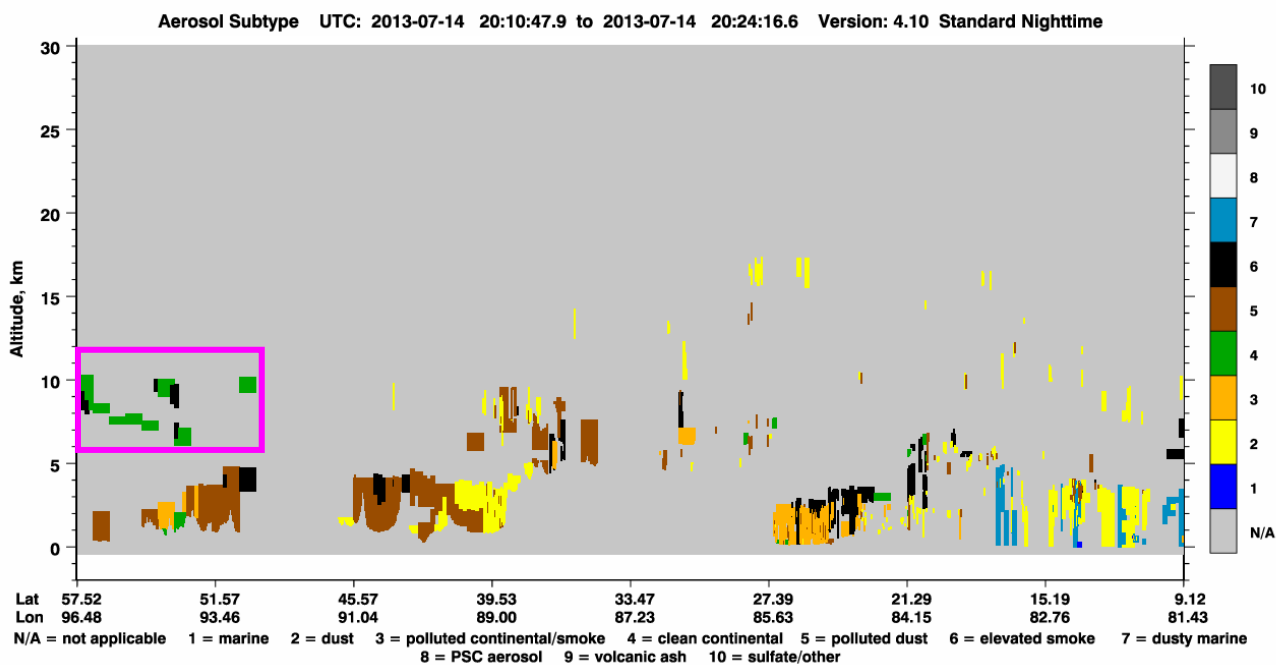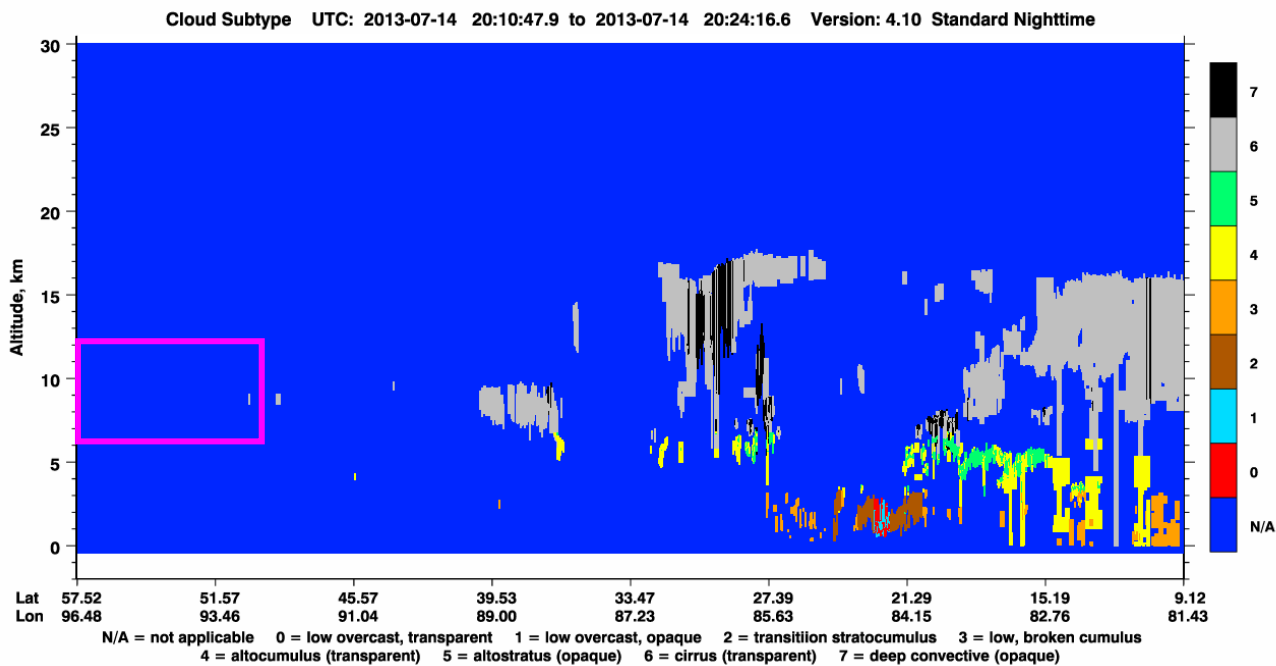

Supplement: Supplementary file 5 [file acp-19-3341-2019-supplement.zip]
